# Supplementary material for: Hand-Held Ultrasound Devices Compared with High-End Ultrasound Systems: A Systematic Review
Source: MDPI journal article supplement (doi:10.3390/diagnostics9020061), 2019-06-15
Supplement: s2 [file s2]

## SUPPLEMENTARY MATERIAL

QUADAS-2  
SCORE CHART

Dalen et al. 2015 [17]    Graven et al. 2015 [18]    Medico et al. 2018 [19]    Andrea et al. 2017 [20]    Stoc k et al. 2015 [21]    Barreiros et al. 2014 [22]    Coskun et al. 2011 [23]    Kameda et al. 2018 [24]    Lavi et al. 2017 [25]    Bruns et al. 2015 [26]    Galjaard et al. 2014 [27]    Troyano et al. 2013 [28]    Sayasneh et al. 2012 [29]    Esposito et al. 2017 [30]    Bonnafy et al. 2013 [31]    Dijos et al. 2011 [32]

| DOMAIN 1: PATIENT SELECTION                                                                           |     |   |     |     |     |     |     |   |   |     |     |     |     |     |   |   |
|-------------------------------------------------------------------------------------------------------|-----|---|-----|-----|-----|-----|-----|---|---|-----|-----|-----|-----|-----|---|---|
| A. Risk of Bias                                                                                       |     |   |     |     |     |     |     |   |   |     |     |     |     |     |   |   |
| Was a consecutive or random sample of patients enrolled ?                                             | Y   | Y | Y   | N   | U   | Y   | Y   | Y | Y | Y   | Y   | Y   | Y   | Y   | Y | Y |
| Was a case-control design avoided?                                                                    | Y   | Y | Y   | N   | Y   | Y   | Y   | Y | Y | Y   | Y   | Y   | Y   | Y   | Y | Y |
| Did the study avoid inappropriate exclusions?                                                         | Y   | Y | Y   | U   | U   | Y   | Y   | Y | U | Y   | Y   | Y   | Y   | Y   | Y | Y |
| Could the selection of patients have introduced bias?                                                 | L   | L | L   | H   | H   | L   | L   | L | L | L   | L   | L   | L   | L   | L | L |
| B. Concerns regarding applicability                                                                   |     |   |     |     |     |     |     |   |   |     |     |     |     |     |   |   |
| Is there concern that the included patients do not match the review question?                         | L   | L | L   | L   | L   | H   | L   | L | L | L   | L   | L   | L   | L   | L | L |
| DOMAIN 2: INDEX TEST                                                                                  |     |   |     |     |     |     |     |   |   |     |     |     |     |     |   |   |
| A. Risk of Bias                                                                                       |     |   |     |     |     |     |     |   |   |     |     |     |     |     |   |   |
| Were the index test results interpreted without knowledge of the results of the reference standard?   | Y   | Y | Y   | N   | Y   | Y   | Y   | Y | Y | Y   | Y   | Y   | Y   | Y   | Y | Y |
| If a threshold was used, was it pre-specified?                                                        | N/A | Y | N/A | N/A | N/A | N/A | N/A | Y | U | N/A | N/A | N/A | N/A | N/A | Y | Y |
| Could the conduct or interpretation of the index test have introduced bias?                           | L   | L | L   | L   | L   | L   | L   | L | L | L   | L   | L   | L   | L   | L | L |
| B. Concerns regarding applicability                                                                   |     |   |     |     |     |     |     |   |   |     |     |     |     |     |   |   |
| Is there concern that the index test, its conduct, or interpretation differ from the review question? | L   | L | L   | L   | L   | L   | L   | L | L | L   | L   | L   | L   | L   | L | L |

**Table S1.** A detailed presentation of our evaluation of risk of bias and applicability of the included studies. Abbreviations explained: Y = Yes; N = No; H = High; L = Low; U = Unclear; N/A = Not Applicable.

**QUADAS-2  
SCORE CHART**

Dalen et al. 2015 [17]   Graven et al. 2015 [18]   Medico et al. 2018 [19]   Andrea et al. 2017 [20]   Stoc k et al. 2015 [21]   Barreiros et al. 2014 [22]   Coskun et al. 2011 [23]   Kameda et al. 2018 [24]   Lavi et al. 2017 [25]   Bruns et al. 2015 [26]   Galjaard et al. 2014 [27]   Troyano et al. 2013 [28]   Sayasneh et al. 2012 [29]   Esposito et al. 2017 [30]   Bonnafy et al. 2013 [31]   Dijos et al. 2011 [32]

| DOMAIN 3: Reference Standard                                                                                        |   |   |   |   |   |   |   |   |   |   |   |   |   |   |   |   |
|---------------------------------------------------------------------------------------------------------------------|---|---|---|---|---|---|---|---|---|---|---|---|---|---|---|---|
| A. Risk of Bias                                                                                                     |   |   |   |   |   |   |   |   |   |   |   |   |   |   |   |   |
| Is the reference standard likely to correctly classify the target condition?                                        | Y | Y | Y | Y | Y | U | Y | Y | Y | Y | Y | Y | Y | Y | Y | Y |
| Were the reference standard results interpreted without knowledge of the results of the index test?                 | Y | Y | Y | Y | U | Y | U | Y | U | N | Y | N | Y | Y | Y | Y |
| Could the reference standard, its conduct, or its interpretation have introduced bias?                              | L | L | L | L | U | U | U | L | U | H | L | H | L | L | L | L |
| B. Concerns regarding applicability                                                                                 |   |   |   |   |   |   |   |   |   |   |   |   |   |   |   |   |
| Is there concern that the target condition as defined by the reference standard does not match the review question? | L | L | L | L | L | L | L | L | L | L | L | L | L | L | L | L |
| DOMAIN 4: FLOW AND TIMING                                                                                           |   |   |   |   |   |   |   |   |   |   |   |   |   |   |   |   |
| A. Risk of Bias                                                                                                     |   |   |   |   |   |   |   |   |   |   |   |   |   |   |   |   |
| Was there an appropriate interval between index test(s) and reference standard?                                     | Y | U | Y | U | U | U | Y | Y | Y | Y | Y | Y | Y | Y | U | U |
| Did all patients receive a reference standard?                                                                      | Y | Y | Y | Y | Y | Y | Y | Y | Y | Y | Y | Y | Y | Y | Y | Y |
| Did patients receive the same reference standard?                                                                   | Y | Y | Y | Y | Y | Y | Y | Y | Y | Y | Y | Y | Y | Y | Y | Y |
| Were all patients included in the analysis?                                                                         | Y | Y | Y | Y | Y | Y | Y | Y | Y | Y | Y | Y | Y | Y | Y | Y |
| Could the patient flow have introduced bias?                                                                        | L | L | L | L | L | L | L | L | L | L | L | L | L | L | L | L |

**Table S1 (continued).** A detailed presentation of our evaluation of risk of bias and applicability of the included studies. Abbreviations explained: Y = Yes; N = No; H = High; L = Low; U = Unclear; N/A = Not Applicable.
